# Supplementary material for: Between tinkering and transformation: A contemporary appraisal of climate change adaptation research on the world's islands
Source: Frontiers journal article supplement (doi:10.3389/fclim.2022.1072231), 2023-01-12
Supplement: Data_Sheet_1.PDF [file Data_Sheet_1.PDF]

## ***Supplementary Material 1***

Supplementary material 1 for the article “Between Tinkering and Transformation: A Contemporary Appraisal of Climate-Change Adaptation Research on the World's Islands”, by Petzold et al., in Frontiers in Climate.

21 December 2022

Contact: jan.petzold@lmu.de

This document contains the following Supplementary Material:

1. PICOS framework
2. Search and screening strategy
3. Overview of variables from the Global Adaptation Mapping Initiative (GAMI)
4. Results of chi-squared analysis
5. List of included articles

### **1 PICOS framework**

We use the following operationalization of the adapted PICoS framework guiding the eligibility criteria in this review:

- Population: Island populations
- Interest: Human adaptation responses to climate change
- Comparator: Not applicable in this island-focused review
- Study type: Empirical research

### **2 Search and screening strategy**

The database used for the screening of articles comes from the Global Adaptation Mapping Initiative (Berrang-Ford et al. 2021). The GAMI search string builds on combining the concepts climate change and adaptation/response and uses several synonyms., e.g., for Web Of Science: TS= (climat\* OR “global warming”) AND TS= (adapt\* OR resilien\* OR (risk NEAR/3 manag\*) OR (risk NEAR/3 reduc\*)). The search was done for titles, abstracts, and keywords (see Fischer et al., 2021 for further details).

Inclusion for this island specific review was done through additional title and abstract screening, and in case of doubt, an additional full text screening.

### **3 Overview of variables from the Global Adaptation Mapping Initiative (GAMI)**

Table SM1.1 lists the variables and labels from the Global Adaptation Mapping Initiative (GAMI) that were used for the review of the island case studies in this manuscript (see Lesnikowski et al. (2021) for further details).

*Table SM1.1: List of variables and labels from the Global Adaptation Mapping Initiative (GAMI)*

| <b>GAMI variable</b>                  | <b>Label</b>                                           |
|---------------------------------------|--------------------------------------------------------|
| <b>Hazard</b>                         | Sea level rise                                         |
|                                       | Extreme precipitation and inland flooding              |
|                                       | Increased frequency and intensity of extreme heat      |
|                                       | Precipitation variability                              |
|                                       | Drought                                                |
|                                       | Rising ocean temperature and ocean acidification       |
|                                       | Loss of Arctic sea ice                                 |
|                                       | General climate impacts                                |
|                                       | Other                                                  |
| <b>Type of response</b>               | Behavioural/cultural                                   |
|                                       | Ecosystem-based                                        |
|                                       | Institutional                                          |
|                                       | Technological/infrastructure                           |
| <b>Actors</b>                         | International or multinational governance institutions |
|                                       | Government (national)                                  |
|                                       | Government (sub-national)                              |
|                                       | Government (local)                                     |
|                                       | Private sector (corporations)                          |
|                                       | Private sector (SME)                                   |
|                                       | Civil society (international/multinational/national)   |
|                                       | Civil society (sub-national or local)                  |
|                                       | Individuals or households                              |
| <b>Indigenous and local knowledge</b> | Yes/no                                                 |
| <b>Adaptation limits</b>              | Low                                                    |
|                                       | Medium                                                 |
|                                       | High                                                   |
|                                       | Uncertain or not assessed                              |
| <b>Depth</b>                          | Low                                                    |
|                                       | Medium                                                 |
|                                       | High                                                   |
|                                       | Uncertain or not assessed                              |

#### 4 Results of chi-squared analysis

The further statistical analysis of relationships between island's political status and the other variables of interest are provided in Table SM1.2 and Figures SM1.1-5).

*Table SM1.2. Pearson's chi-squared tests for island political status with the variables hazard, island type, actors, depth, and response type*

| <b>Variable</b> | <b>x-squared</b> | <b>Df</b> | <b>p-value</b> |
|-----------------|------------------|-----------|----------------|
| Hazards         | 95.202           | 27        | 1.558e-09      |
| Island type     | 153.97           | 12        | < 2.2e-16      |
| Actors          | 84.366           | 27        | 8.097e-08      |
| Depth           | 22.759           | 9         | 0.006761       |

|               |        |   |        |
|---------------|--------|---|--------|
| Response type | 6.7215 | 9 | 0.6661 |
|---------------|--------|---|--------|

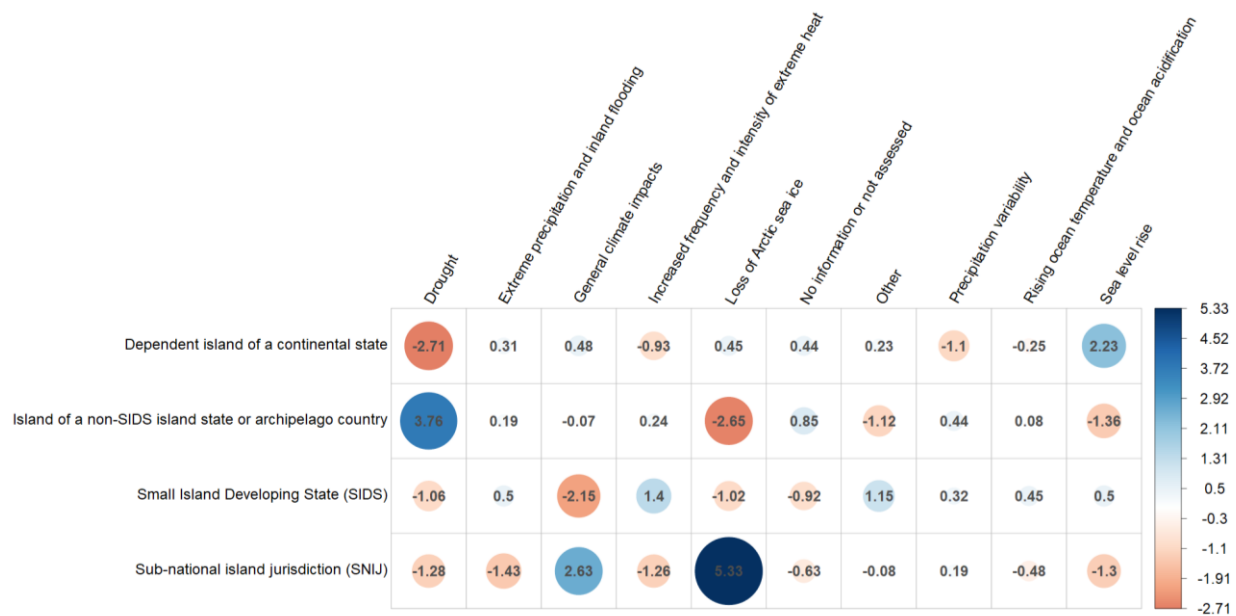

*Figure SM1.1: Political status of islands related to climate hazards. Results of the chi-square test calculating the residuals, that is, the difference between the observed and the expected frequency of each combination of political status and hazard, are shown. Residuals below -2 and above 2 can be considered significant. Positive residuals (blue) indicate a higher observed frequency of an actor-role combination, and negative residuals (red) indicate a lower than expected frequency. The size of the circles corresponds to the value of the residuals. X-squared = 95.202, df = 27, p-value = 1.558e-09.*

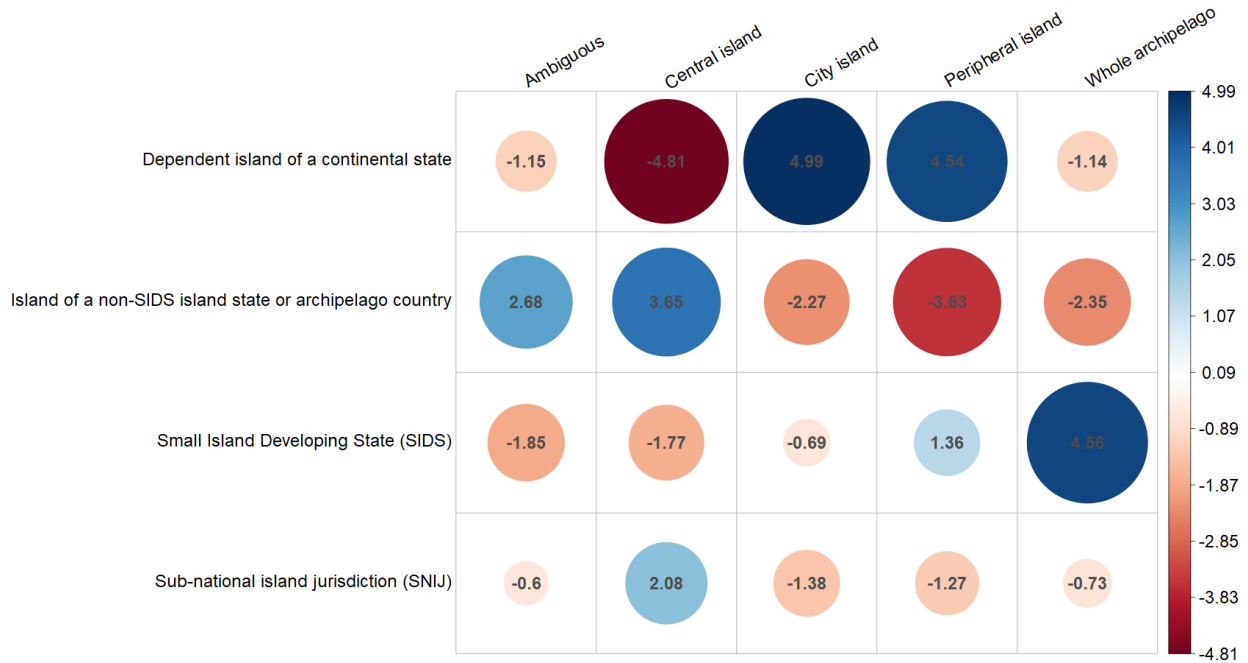

*Figure SM1.2: Political status of islands related to island types. Results of the chi-square test calculating the residuals, that is, the difference between the observed and the expected frequency of each combination of political status and island type, are shown. Residuals below -2 and above 2 can be considered significant. Positive residuals (blue) indicate a higher observed frequency of an actor-role combination, and negative residuals (red) indicate a lower than expected frequency. The size of the circles corresponds to the value of the residuals. X-squared = 153.97, df = 12, p-value < 2.2e-16*

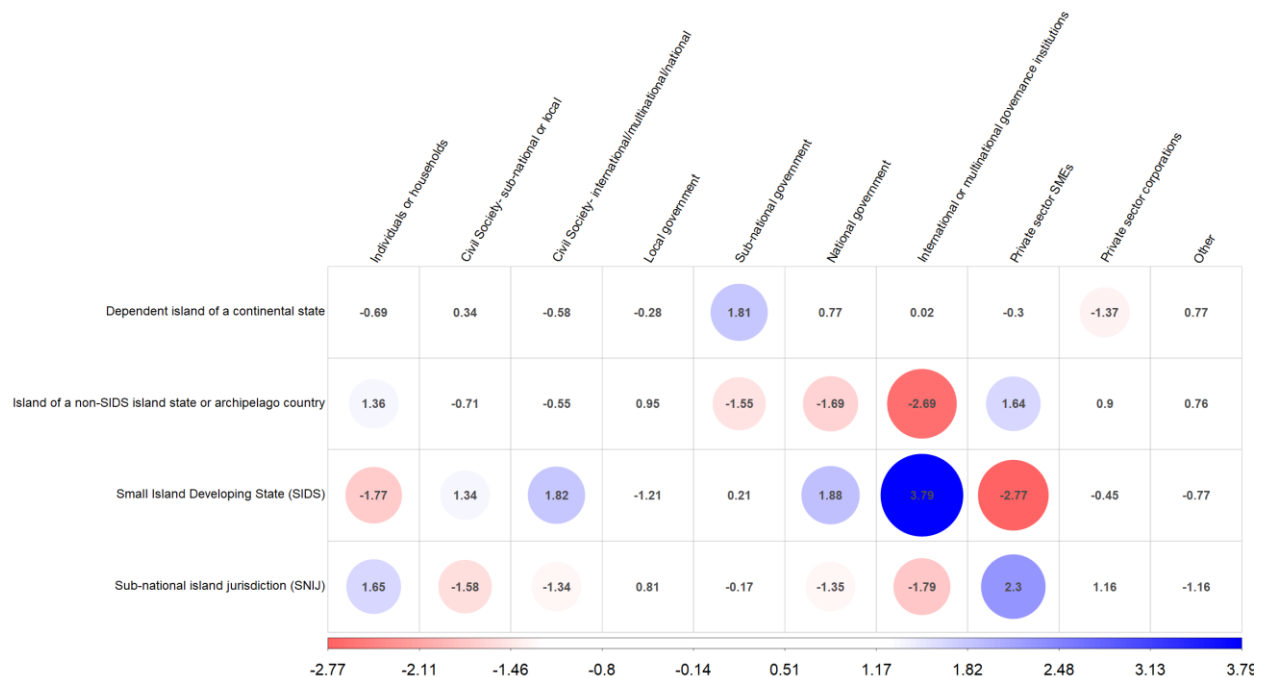

Figure SM1.3: Political status of islands related to actors. Results of the chi-square test calculating the residuals, that is, the difference between the observed and the expected frequency of each combination of political status and actor type, are shown. Residuals below -2 and above 2 can be considered significant. Positive residuals (blue) indicate a higher observed frequency of an actor-role combination, and negative residuals (red) indicate a lower than expected frequency. The size of the circles corresponds to the value of the residuals. X-squared = 84.366, df = 27, p-value = 8.097e-08

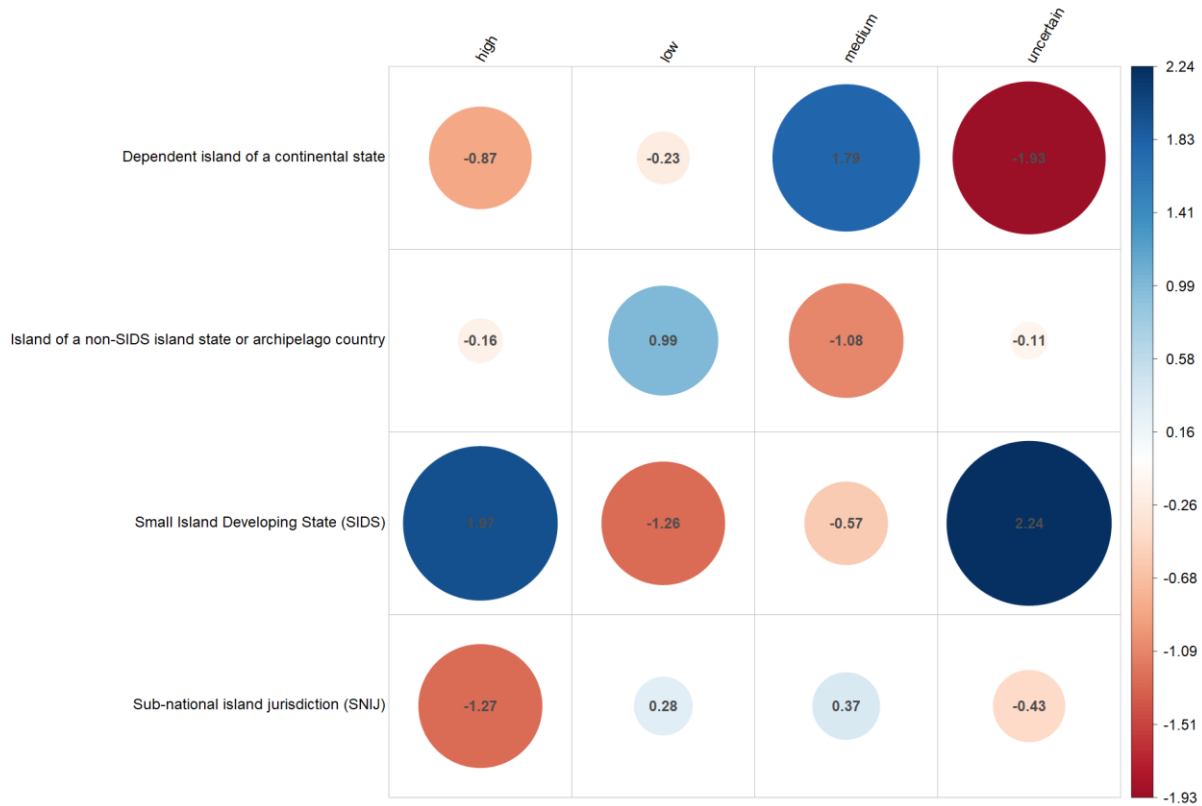

Figure SM1.4: Political status of islands related to level of depth. Results of the chi-square test calculating the residuals, that is, the difference between the observed and the expected frequency of each combination of political status and level of depth, are shown. Residuals below -2 and above 2 can be considered significant. Positive residuals (blue) indicate a higher observed frequency of an actor-role combination, and negative residuals (red) indicate a lower than expected frequency. The size of the circles corresponds to the value of the residuals. X-squared = 6.7215, df = 9, p-value =

0.6661

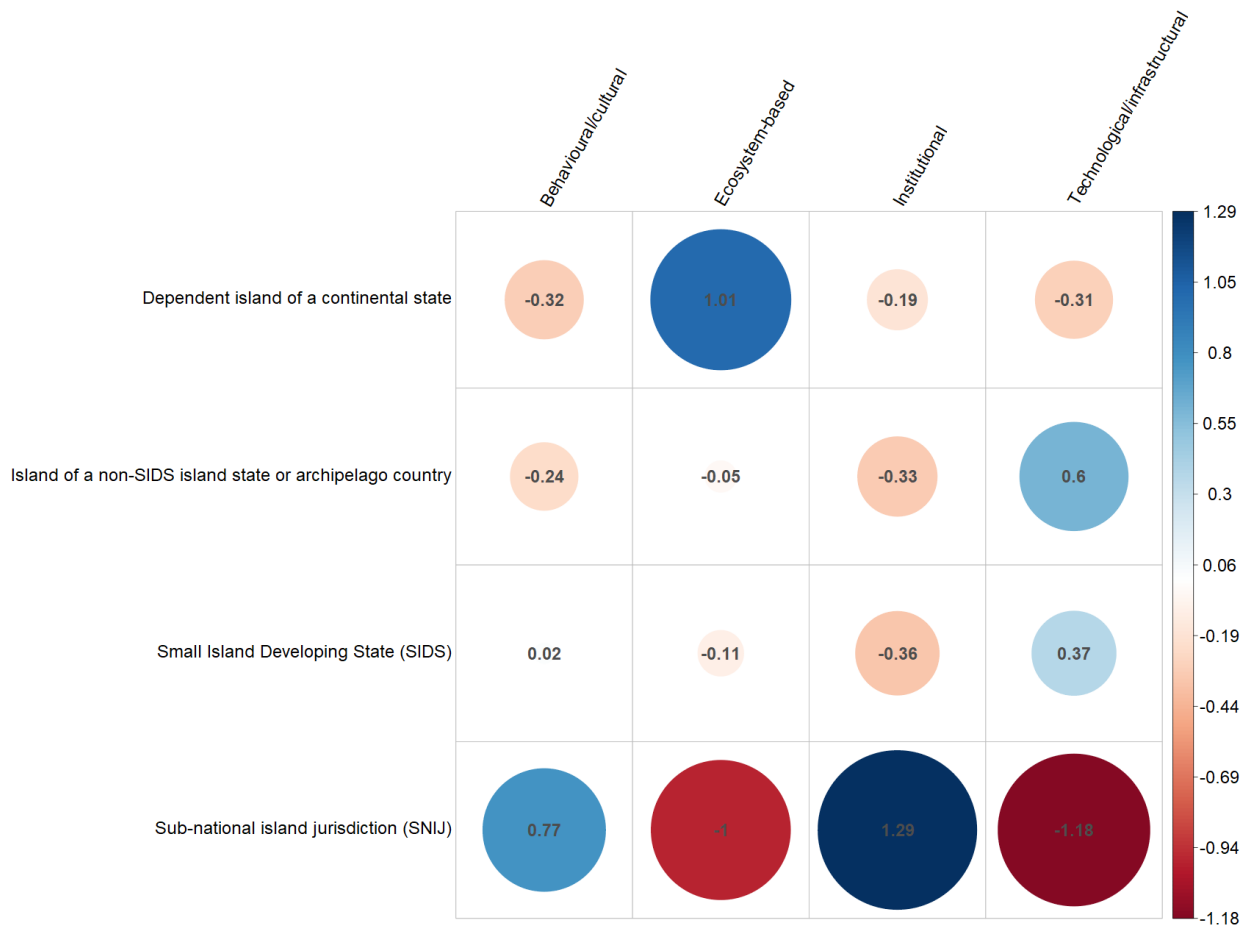

*Figure SM1.5: Political status of islands related to response types. Results of the chi-square test calculating the residuals, that is, the difference between the observed and the expected frequency of each combination of political status and response type, are shown. Residuals below -2 and above 2 can be considered significant. Positive residuals (blue) indicate a higher observed frequency of an actor-role combination, and negative residuals (red) indicate a lower than expected frequency. The size of the circles corresponds to the value of the residuals. The test was not significant. X-squared = 610.77,  $df = 70$ ,  $p\text{-value} < 0.001$ .*

## 5 List of included articles

The following articles from the GAMI database met the inclusion for this review (see Supplementary Material 1 for the full review database):

Abidoye, B. O., Kurukulasuriya, P., & Mendelsohn, R. (2017). South-east Asian farmer perceptions of climate change. In *Climate Change Economics* (Vol. 08, Issue 03, p. 1740006). World Scientific Pub Co Pte Lt. <https://doi.org/10.1142/s2010007817400061>

- Ahmed, I., Ayebe-Karlsson, S., van der Geest, K., Huq, S., & Jordan, J. C. (2019). Climate change, environmental stress and loss of livelihoods can push people towards illegal activities: a case study from coastal Bangladesh. In *Climate and Development* (Vol. 11, Issue 10, pp. 907–917). Informa UK Limited. <https://doi.org/10.1080/17565529.2019.1586638>
- Ahsan, Md. N. (2017). Can Strategies to Cope with Hazard Shocks be Explained by At-Risk Households' Socioeconomic Asset Profile? Evidence from Tropical Cyclone-Prone Coastal Bangladesh. In *International Journal of Disaster Risk Science* (Vol. 8, Issue 1, pp. 46–63). Springer Science and Business Media LLC. <https://doi.org/10.1007/s13753-017-0119-8>
- Albert, S., Bronen, R., Tooler, N., Leon, J., Yee, D., Ash, J., Boseto, D., & Grinham, A. (2017). Heading for the hills: climate-driven community relocations in the Solomon Islands and Alaska provide insight for a 1.5 °C future. In *Regional Environmental Change* (Vol. 18, Issue 8, pp. 2261–2272). Springer Science and Business Media LLC. <https://doi.org/10.1007/s10113-017-1256-8>
- Allgood, L., & McNamara, K. E. (2017). Climate-induced migration: Exploring local perspectives in Kiribati. In *Singapore Journal of Tropical Geography* (Vol. 38, Issue 3, pp. 370–385). Wiley. <https://doi.org/10.1111/sjtg.12202>
- Almaden, C. R. C., Bacongus, R. DT., Camacho Jr., J. V., Rola, A. C., Pulhin, J. M., Ancog, R. C. (2019). Determinants of Adaptation for Slow-Onset Hazards: The Case of Rice-Farming Households Affected by Seawater Intrusion in Northern Mindanao, Philippines. *Asian Journal of Agriculture and Development*, 16(1), 93–116.
- Alonso, A. D., & Liu, Y. (2013). Climate Change in the Wine Sector of an Ultra-Peripheral European Region: A Case Study. In *Agroecology and Sustainable Food Systems* (Vol. 37, Issue 3, pp. 291–315). Informa UK Limited. <https://doi.org/10.1080/10440046.2012.712089>
- Alston, M., & Akhter, B. (2016). Gender and food security in Bangladesh: the impact of climate change. In *Gender, Place & Culture* (Vol. 23, Issue 10, pp. 1450–1464). Informa UK Limited. <https://doi.org/10.1080/0966369x.2016.1204997>
- Álvarez-Berrios, N. L., Soto-Bayó, S., Holupchinski, E., Fain, S. J., & Gould, W. A. (2018). Correlating drought conservation practices and drought vulnerability in a tropical agricultural system. In *Renewable Agriculture and Food Systems* (Vol. 33, Issue 3, pp. 279–291). Cambridge University Press (CUP). <https://doi.org/10.1017/s174217051800011x>
- Amaru, S., & Chhetri, N. B. (2013). Climate adaptation: Institutional response to environmental constraints, and the need for increased flexibility, participation, and integration of approaches. *Applied Geography* (Sevenoaks, England), 39, 128–139. <https://doi.org/10.1016/j.apgeog.2012.12.006>
- Amin, C., Sukamdi, & Rijanta. (2019). Modeling (Im) mobility: the decision to stay in disaster prone area amongs fishermen community in Semarang. In A. Cardenas Tristan, J. Tetuko Sri Sumantyo, E. Haryono, R. Fitria Putri, D. Rahmawati Hizbaro, & E. Wulanmei (Eds.), *E3S Web of Conferences* (Vol. 76, p. 03012). EDP Sciences. <https://doi.org/10.1051/e3sconf/20197603012>
- Archer, L., Ford, J. D., Pearce, T., Kowal, S., Gough, W. A., & Allurut, M. (2016). Longitudinal assessment of climate vulnerability: a case study from the Canadian Arctic. In *Sustainability Science* (Vol. 12, Issue 1, pp. 15–29). Springer Science and Business Media LLC. <https://doi.org/10.1007/s11625-016-0401-5>

- Arie, S., Ayu, W., Dinesta, A., Tresta, C., Abdu, A., Rachmat, B., Agus, S., Joni, H. (2018). Assessing Factors that affect Selection of Adaptation Strategies for Small-Scale Fishing Communities. *Disaster Advances*, 11(8), 11–21.
- Aswani, S., Vaccaro, I., Abernethy, K., Albert, S., & de Pablo, J. F.-L. (2015). Can Perceptions of Environmental and Climate Change in Island Communities Assist in Adaptation Planning Locally? In *Environmental Management* (Vol. 56, Issue 6, pp. 1487–1501). Springer Science and Business Media LLC. <https://doi.org/10.1007/s00267-015-0572-3>
- Ayeb-Karlsson, S., van der Geest, K., Ahmed, I., Huq, S., & Warner, K. (2016). A people-centred perspective on climate change, environmental stress, and livelihood resilience in Bangladesh. In *Sustainability Science* (Vol. 11, Issue 4, pp. 679–694). Springer Science and Business Media LLC. <https://doi.org/10.1007/s11625-016-0379-z>
- Bacud, S. T. (2018). Integration of Indigenous and Scientific Knowledge in Disaster Risk Reduction: Resilience Building of a Marginalized Sampaguita Growing Community in the Philippines. In *Procedia Engineering* (Vol. 212, pp. 511–518). Elsevier BV. <https://doi.org/10.1016/j.proeng.2018.01.066>
- Baird, J., Plummer, R., Moore, M.-L., & Brandes, O. (2016). Introducing Resilience Practice to Watershed Groups: What Are the Learning Effects? In *Society & Natural Resources* (Vol. 29, Issue 10, pp. 1214–1229). Informa UK Limited. <https://doi.org/10.1080/08941920.2015.1107788>
- Baptiste, A. K. (2017). Climate change knowledge, concerns, and behaviors among Caribbean fishers. In *Journal of Environmental Studies and Sciences* (Vol. 8, Issue 1, pp. 51–62). Springer Science and Business Media LLC. <https://doi.org/10.1007/s13412-017-0434-9>
- Barnett, J., & McMichael, C. (2018). The effects of climate change on the geography and timing of human mobility. In *Population and Environment* (Vol. 39, Issue 4, pp. 339–356). Springer Science and Business Media LLC. <https://doi.org/10.1007/s11111-018-0295-5>
- Barua, P., Rahman, S. H., & Molla, M. H. (2017). Sustainable adaptation for resolving climate displacement issues of south eastern islands in Bangladesh. In *International Journal of Climate Change Strategies and Management* (Vol. 9, Issue 6, pp. 790–810). Emerald. <https://doi.org/10.1108/ijccsm-02-2017-0026>
- Becken, S., & Wilson, J. (2013). The impacts of weather on tourist travel. In *Tourism Geographies* (Vol. 15, Issue 4, pp. 620–639). Informa UK Limited. <https://doi.org/10.1080/14616688.2012.762541>
- Berse, K. (2017). Climate change from the lens of Malolos children: perception, impact and adaptation. In *Disaster Prevention and Management: An International Journal* (Vol. 26, Issue 2, pp. 217–229). Emerald. <https://doi.org/10.1108/dpm-10-2016-0214>
- Beyerl, K., Mieg, H. A., & Weber, E. (2018). Comparing perceived effects of climate-related environmental change and adaptation strategies for the Pacific small island states of Tuvalu, Samoa, and Tonga. In *Island Studies Journal* (Vol. 13, Issue 1, pp. 25–44). Island Studies Journal. <https://doi.org/10.24043/isj.54>
- Bhullar, L. (2013). Climate Change Adaptation and Water Policy: Lessons from Singapore. In *Sustainable Development* (Vol. 21, Issue 3, pp. 152–159). Wiley. <https://doi.org/10.1002/sd.1546>



- Birk, T., & Rasmussen, K. (2014). Migration from atolls as climate change adaptation: Current practices, barriers and options in Solomon Islands. In *Natural Resources Forum* (Vol. 38, Issue 1, pp. 1–13). Wiley. <https://doi.org/10.1111/1477-8947.12038>
- Bohensky, E. L., Smajgl, A., & Brewer, T. (2012). Patterns in household-level engagement with climate change in Indonesia. In *Nature Climate Change* (Vol. 3, Issue 4, pp. 348–351). Springer Science and Business Media LLC. <https://doi.org/10.1038/nclimate1762>
- Bott, L.-M., & Braun, B. (2019). How do households respond to coastal hazards? A framework for accommodating strategies using the example of Semarang Bay, Indonesia. In *International Journal of Disaster Risk Reduction* (Vol. 37, p. 101177). Elsevier BV. <https://doi.org/10.1016/j.ijdr.2019.101177>
- Brown, P. R., Bridle, K. L., & Crimp, S. J. (2016). Assessing the capacity of Australian broadacre mixed farmers to adapt to climate change: Identifying constraints and opportunities. In *Agricultural Systems* (Vol. 146, pp. 129–141). Elsevier BV. <https://doi.org/10.1016/j.agsy.2016.05.002>
- Bryan, K., Ward, S., Barr, S., & Butler, D. (2019). Coping with Drought: Perceptions, Intentions and Decision-Stages of South West England Households. In *Water Resources Management* (Vol. 33, Issue 3, pp. 1185–1202). Springer Science and Business Media LLC. <https://doi.org/10.1007/s11269-018-2175-2>
- Buchanan, M. K., Oppenheimer, M., & Parris, A. (2019). Values, Bias, and Stressors Affect Intentions to Adapt to Coastal Flood Risk: A Case Study from New York City. In *Weather, Climate, and Society* (Vol. 11, Issue 4, pp. 809–821). American Meteorological Society. <https://doi.org/10.1175/wcas-d-18-0082.1>
- Bunce, A., Ford, J., Harper, S., & Edge, V. (2016). Vulnerability and adaptive capacity of Inuit women to climate change: a case study from Iqaluit, Nunavut. In *Natural Hazards*. Springer Science and Business Media LLC. <https://doi.org/10.1007/s11069-016-2398-6>
- Burchfield, E. K., & Gilligan, J. (2016). Agricultural adaptation to drought in the Sri Lankan dry zone. In *Applied Geography* (Vol. 77, pp. 92–100). Elsevier BV. <https://doi.org/10.1016/j.apgeog.2016.10.003>
- Burchfield, E. K., & Gilligan, J. M. (2016). Dynamics of individual and collective agricultural adaptation to water scarcity. In *2016 Winter Simulation Conference (WSC)*. 2016 Winter Simulation Conference (WSC). IEEE. <https://doi.org/10.1109/wsc.2016.7822216>
- Burchfield, E. K., & Poterie, A. T. de la. (2018). Determinants of crop diversification in rice-dominated Sri Lankan agricultural systems. In *Journal of Rural Studies* (Vol. 61, pp. 206–215). Elsevier BV. <https://doi.org/10.1016/j.jrurstud.2018.05.010>
- Chaijaroen, P. (2019). Long-lasting income shocks and adaptations: Evidence from coral bleaching in Indonesia. In *Journal of Development Economics* (Vol. 136, pp. 119–136). Elsevier BV. <https://doi.org/10.1016/j.jdeveco.2018.10.002>
- Chandra, A., & Gaganis, P. (2015). Deconstructing vulnerability and adaptation in a coastal river basin ecosystem: a participatory analysis of flood risk in Nadi, Fiji Islands. In *Climate and Development* (Vol. 8, Issue 3, pp. 256–269). Informa UK Limited. <https://doi.org/10.1080/17565529.2015.1016884>

- Chiang, Y.-C. (2018). Exploring community risk perceptions of climate change - A case study of a flood-prone urban area of Taiwan. In *Cities* (Vol. 74, pp. 42–51). Elsevier BV. <https://doi.org/10.1016/j.cities.2017.11.001>
- Chiang, Y.-C., & Ling, T.-Y. (2017). Exploring Flood Resilience Thinking in the Retail Sector under Climate Change: A Case Study of an Estuarine Region of Taipei City. In *Sustainability* (Vol. 9, Issue 9, p. 1650). MDPI AG. <https://doi.org/10.3390/su9091650>
- Chou, Y. -H., Hu, A. Y. -C., Chen, Y. -F., Chang, C. -W. Developing a GIS-based Tool for Evaluating Adaptation Strategies for Highway and Rail Facilities in Taiwan.
- Cradock-Henry, N., Fountain, J., & Buelow, F. (2018). Transformations for Resilient Rural Futures: The Case of Kaikōura, Aotearoa-New Zealand. In *Sustainability* (Vol. 10, Issue 6, p. 1952). MDPI AG. <https://doi.org/10.3390/su10061952>
- Currenti, R., Pearce, T., Salabogi, T., Vuli, L., Salabogi, K., Doran, B., Kitson, R., & Ford, J. (2019). Adaptation to Climate Change in an Interior Pacific Island Village: a Case Study of Nawairuku, Ra, Fiji. In *Human Ecology* (Vol. 47, Issue 1, pp. 65–80). Springer Science and Business Media LLC. <https://doi.org/10.1007/s10745-019-0049-8>
- Dalimunthe, S. (2018). Who Manages Space? Eco-DRR and the Local Community. In *Sustainability* (Vol. 10, Issue 6, p. 1705). MDPI AG. <https://doi.org/10.3390/su10061705>
- Dannevig, H., & Hovelsrud, G. K. (2015). Understanding the need for adaptation in a natural resource dependent community in Northern Norway: issue salience, knowledge and values. In *Climatic Change* (Vol. 135, Issue 2, pp. 261–275). Springer Science and Business Media LLC. <https://doi.org/10.1007/s10584-015-1557-1>
- Deb, A. K., & Haque, C. E. (2016). Livelihood Diversification as a Climate Change Coping Strategy Adopted by Small-Scale Fishers of Bangladesh. In *Climate Change Management* (pp. 345–368). Springer International Publishing. [https://doi.org/10.1007/978-3-319-39880-8\\_21](https://doi.org/10.1007/978-3-319-39880-8_21)
- Deb, A. K., & Haque, C. E. (2017). Multi-dimensional coping and adaptation strategies of small-scale fishing communities of Bangladesh to climate change induced stressors. In *International Journal of Climate Change Strategies and Management* (Vol. 9, Issue 4, pp. 446–468). Emerald. <https://doi.org/10.1108/ijccsm-06-2016-0078>
- Defiesta, G., Rapera, C. L. (2014). Measuring Adaptive Capacity of Farmers to Climate Change and Variability: Application of a Composite Index to an Agricultural Community in the Philippines. *Journal of Environmental Science and Development*, 17(2), 48–62.
- Dharmawan, A., Kumala Putri, E., Mardiyarningsih, D. (2016). Smallholder Farmers' Resilience in Rural-ecological Crises: Case Studies from West Java, Indonesia. In *The International Journal of Sustainability in Economic, Social, and Cultural Context* 12 (3).
- Dubois, B., & Krasny, M. E. (2016). Educating with resilience in mind: Addressing climate change in post-Sandy New York City. In *The Journal of Environmental Education* (Vol. 47, Issue 4, pp. 255–270). Informa UK Limited. <https://doi.org/10.1080/00958964.2016.1167004>
- Elrick-Barr, C. E., Smith, T. F., Preston, B. L., Thomsen, D. C., & Baum, S. (2016). How are coastal households responding to climate change? In *Environmental Science & Policy* (Vol. 63, pp. 177–186). Elsevier BV. <https://doi.org/10.1016/j.envsci.2016.05.013>

- Esham, M., & Garforth, C. (2012). Agricultural adaptation to climate change: insights from a farming community in Sri Lanka. In *Mitigation and Adaptation Strategies for Global Change* (Vol. 18, Issue 5, pp. 535–549). Springer Science and Business Media LLC.  
<https://doi.org/10.1007/s11027-012-9374-6>
- Evangelista, R. J., Cruz, A. C., & Lasco, R. (2016). Knowledge, Attitude and Practice of Smallholder Farmers Regarding Climate Change and Agroforestry: A Case Study of Farmers in Peñablanca, Cagayan. In *Journal of Environmental Science and Management* (pp. 42–55). School of Environmental Science and Management, University of the Philippines Los Banos.  
[https://doi.org/10.47125/jesam/2016\\_sp1/04](https://doi.org/10.47125/jesam/2016_sp1/04)
- Fedele, G., Locatelli, B., Djoudi, H., & Colloff, M. J. (2018). Reducing risks by transforming landscapes: Cross-scale effects of land-use changes on ecosystem services. In A. Zia (Ed.), *PLOS ONE* (Vol. 13, Issue 4, p. e0195895). Public Library of Science (PLOS).  
<https://doi.org/10.1371/journal.pone.0195895>
- Flannery, W., Lynch, K., & Ó Cinnéide, M. (2015). Consideration of coastal risk in the Irish spatial planning process. In *Land Use Policy* (Vol. 43, pp. 161–169). Elsevier BV.  
<https://doi.org/10.1016/j.landusepol.2014.11.001>
- Ford, J. D., McDowell, G., Shirley, J., Pitre, M., Siewierski, R., Gough, W., Duerden, F., Pearce, T., Adams, P., & Statham, S. (2013). The Dynamic Multiscale Nature of Climate Change Vulnerability: An Inuit Harvesting Example. In *Annals of the Association of American Geographers* (Vol. 103, Issue 5, pp. 1193–1211). Informa UK Limited.  
<https://doi.org/10.1080/00045608.2013.776880>
- Forster, J., Lake, I. R., Watkinson, A. R., & Gill, J. A. (2014). Marine dependent livelihoods and resilience to environmental change: A case study of Anguilla. In *Marine Policy* (Vol. 45, pp. 204–212). Elsevier BV. <https://doi.org/10.1016/j.marpol.2013.10.017>
- Fujisawa, M., & Kobayashi, K. (2013). Shifting from apple to peach farming in Kazuno, northern Japan: perceptions of and responses to climatic and non-climatic impacts. In *Regional Environmental Change* (Vol. 13, Issue 6, pp. 1211–1222). Springer Science and Business Media LLC. <https://doi.org/10.1007/s10113-013-0434-6>
- Fujisawa, M., Kobayashi, K., Johnston, P., & New, M. (2015). What Drives Farmers to Make Top-Down or Bottom-Up Adaptation to Climate Change and Fluctuations? A Comparative Study on 3 Cases of Apple Farming in Japan and South Africa. In A. Zia (Ed.), *PLOS ONE* (Vol. 10, Issue 3, p. e0120563). Public Library of Science (PLOS).  
<https://doi.org/10.1371/journal.pone.0120563>
- Gadamus, L. (2013). Linkages between human health and ocean health: a participatory climate change vulnerability assessment for marine mammal harvesters. In *International Journal of Circumpolar Health* (Vol. 72, Issue 1, p. 20715). Informa UK Limited.  
<https://doi.org/10.3402/ijch.v72i0.20715>
- Galappaththi, E. K., Ford, J. D., Bennett, E. M., & Berkes, F. (2019). Climate change and community fisheries in the arctic: A case study from Pangnirtung, Canada. In *Journal of Environmental Management* (Vol. 250, p. 109534). Elsevier BV.  
<https://doi.org/10.1016/j.jenvman.2019.109534>
- García Sánchez, F., Solecki, W. D., & Ribalaygua Batalla, C. (2018). Climate change adaptation in Europe and the United States: A comparative approach to urban green spaces in Bilbao and

- New York City. In *Land Use Policy* (Vol. 79, pp. 164–173). Elsevier BV.  
<https://doi.org/10.1016/j.landusepol.2018.08.010>
- Gersonius, B., van Buuren, A., Zethof, M., & Kelder, E. (2016). Resilient flood risk strategies: institutional preconditions for implementation. In *Ecology and Society* (Vol. 21, Issue 4). Resilience Alliance, Inc. <https://doi.org/10.5751/es-08752-210428>
- Goldbach, C. (2017). Out-migration from Coastal Areas in Ghana and Indonesia—the Role of Environmental Factors. In *CESifo Economic Studies* (Vol. 63, Issue 4, pp. 529–559). Oxford University Press (OUP). <https://doi.org/10.1093/cesifo/ifx007>
- Gomez, N. (2015). Climate change and adaptation on selected crops in Southern Philippines. In *International Journal of Climate Change Strategies and Management* (Vol. 7, Issue 3, pp. 290–305). Emerald. <https://doi.org/10.1108/ijccsm-03-2013-0014>
- Granderson, A. A. (2017). The Role of Traditional Knowledge in Building Adaptive Capacity for Climate Change: Perspectives from Vanuatu. In *Weather, Climate, and Society* (Vol. 9, Issue 3, pp. 545–561). American Meteorological Society. <https://doi.org/10.1175/wcas-d-16-0094.1>
- Gunathilaka, R. P. D., Smart, J. C. R., & Fleming, C. M. (2018). Adaptation to climate change in perennial cropping systems: Options, barriers and policy implications. In *Environmental Science & Policy* (Vol. 82, pp. 108–116). Elsevier BV.  
<https://doi.org/10.1016/j.envsci.2018.01.011>
- Gunawansa, A., & Kua, H. W. (2011). A Comparison of Climate Change Mitigation and Adaptation Strategies for the Construction Industries of Three Coastal Territories. In *Sustainable Development* (Vol. 22, Issue 1, pp. 52–62). Wiley. <https://doi.org/10.1002/sd.527>
- Ha’apio, M. O., Gonzalez, R., & Wairiu, M. (2019). Is there any chance for the poor to cope with extreme environmental events? Two case studies in the Solomon Islands. In *World Development* (Vol. 122, pp. 514–524). Elsevier BV.  
<https://doi.org/10.1016/j.worlddev.2019.06.023>
- Hamilton-Webb, A., Manning, L., Naylor, R., & Conway, J. (2016). The relationship between risk experience and risk response: a study of farmers and climate change. In *Journal of Risk Research* (Vol. 20, Issue 11, pp. 1379–1393). Informa UK Limited.  
<https://doi.org/10.1080/13669877.2016.1153506>
- Harries, T., McEwen, L., & Wragg, A. (2018). Why it takes an ‘ontological shock’ to prompt increases in small firm resilience: Sensemaking, emotions and flood risk. In *International Small Business Journal: Researching Entrepreneurship* (Vol. 36, Issue 6, pp. 712–733). SAGE Publications. <https://doi.org/10.1177/0266242618765231>
- Harvey, C. A., Rakotobe, Z. L., Rao, N. S., Dave, R., Razafimahatratra, H., Rabarijohn, R. H., Rajaofara, H., & MacKinnon, J. L. (2014). Extreme vulnerability of smallholder farmers to agricultural risks and climate change in Madagascar. In *Philosophical Transactions of the Royal Society B: Biological Sciences* (Vol. 369, Issue 1639, p. 20130089). The Royal Society. <https://doi.org/10.1098/rstb.2013.0089>
- Hasan, M. K., Desiere, S., D’Haese, M., & Kumar, L. (2018). Impact of climate-smart agriculture adoption on the food security of coastal farmers in Bangladesh. In *Food Security* (Vol. 10, Issue 4, pp. 1073–1088). Springer Science and Business Media LLC.  
<https://doi.org/10.1007/s12571-018-0824-1>

- Haynes, K., & Tanner, T. M. (2013). Empowering young people and strengthening resilience: youth-centred participatory video as a tool for climate change adaptation and disaster risk reduction. In *Children's Geographies* (Vol. 13, Issue 3, pp. 357–371). Informa UK Limited. <https://doi.org/10.1080/14733285.2013.848599>
- Hossain, K. M., Zaman, F. (2018). Unravelling coastal people's adaptation to salinity: evidence from Bangladesh. *Int. J. Environment and Sustainable Development*, 17(1), 70–92.
- Hu, D., Te-Pai, J., Chen, Y.-Y. (2018). A Study of Flood Disaster Risk Communication Model and Adaptive Behaviours for River-Watershed residents in Taiwan. In *International review for spatial planning and sustainable development A: Planning Strategies and Design* 6 (4), pp. 128-147. [http://dx.doi.org/10.14246/irspsda.6.4\\_128](http://dx.doi.org/10.14246/irspsda.6.4_128)
- Hughey, K. F. D., & Becken, S. (2014). Understanding climate coping as a basis for strategic climate change adaptation – The case of Queenstown-Lake Wanaka, New Zealand. In *Global Environmental Change* (Vol. 27, pp. 168–179). Elsevier BV. <https://doi.org/10.1016/j.gloenvcha.2014.03.004>
- Hui-Wen Chuang, Shing-Ru Yang, Ting Ou, & Tzu-Ping Lin. (2016). CLIMATIC ADAPTATION OF COASTAL COMMUNITIES ON THE SOUTHWEST OF TAIWAN. *Journal of Marine Science and Technology*, 24(6). <https://doi.org/10.6119/JMST-016-0714-2>
- Islam, Md. M., Sallu, S., Hubacek, K., & Paavola, J. (2014). Migrating to tackle climate variability and change? Insights from coastal fishing communities in Bangladesh. In *Climatic Change* (Vol. 124, Issue 4, pp. 733–746). Springer Science and Business Media LLC. <https://doi.org/10.1007/s10584-014-1135-y>
- Jaja, J., Dawson, J., & Gaudet, J. (2016). Using Social Network Analysis to examine the role that institutional integration plays in community-based adaptive capacity to climate change in Caribbean small island communities. In *Local Environment* (Vol. 22, Issue 4, pp. 424–442). Informa UK Limited. <https://doi.org/10.1080/13549839.2016.1213711>
- Jamero, Ma. L., Onuki, M., Esteban, M., & Tan, N. (2018). Community-based adaptation in low-lying islands in the Philippines: challenges and lessons learned. In *Regional Environmental Change* (Vol. 18, Issue 8, pp. 2249–2260). Springer Science and Business Media LLC. <https://doi.org/10.1007/s10113-018-1332-8>
- Janif, S. Z., Nunn, P. D., Geraghty, P., Aalbersberg, W., Thomas, F. R., & Camailakeba, M. (2016). Value of traditional oral narratives in building climate-change resilience: insights from rural communities in Fiji. In *Ecology and Society* (Vol. 21, Issue 2). Resilience Alliance, Inc. <https://doi.org/10.5751/es-08100-210207>
- Javeline, D., & Kijewski-Correa, T. (2018). Coastal homeowners in a changing climate. In *Climatic Change* (Vol. 152, Issue 2, pp. 259–274). Springer Science and Business Media LLC. <https://doi.org/10.1007/s10584-018-2257-4>
- Jianjun, J., & Francisco, H. (2013). Sea-level rise adaptation measures in local communities of Zhejiang Province, China. In *Ocean & Coastal Management* (Vol. 71, pp. 187–194). Elsevier BV. <https://doi.org/10.1016/j.ocecoaman.2012.10.020>
- Johannsdottir, L., Davidsdottir, B., Goodsite, M. E., & Olafsson, S. (2014). What is the potential and demonstrated role of non-life insurers in fulfilling climate commitments? A case study of Nordic insurers. In *Environmental Science & Policy* (Vol. 38, pp. 87–106). Elsevier BV. <https://doi.org/10.1016/j.envsci.2013.10.011>

- Johnston, I. (2014). Disaster management and climate change adaptation: a remote island perspective. In *Disaster Prevention and Management* (Vol. 23, Issue 2, pp. 123–137). Emerald. <https://doi.org/10.1108/dpm-06-2013-0096>
- Kaluarachchi, Y. (2013). The awareness of two stakeholders and the resilience of their built assets to extreme weather events in England. In D. Bingunath Ingirige and Keith Jones (Ed.), *International Journal of Disaster Resilience in the Built Environment* (Vol. 4, Issue 3, pp. 297–316). Emerald. <https://doi.org/10.1108/ijdrbe-08-2012-0027>
- Khalil, M.B., Jacobs, B.C., Kuruppu, N. (2016). Grassroots Technologies and Community Trust in Climate Change Adaptation: Learning from Coastal Settlements of Bangladesh. In W. Leal Filho (Eds.), *Innovation in Climate Change Adaptation. Climate Change Management* (pp. 297–311). Springer.
- Khan, F. N., Collins, A. M., Nayak, P. K., & Armitage, D. (2018). Women's perspectives of small-scale fisheries and environmental change in Chilika lagoon, India. In *Maritime Studies* (Vol. 17, Issue 2, pp. 145–154). Springer Science and Business Media LLC. <https://doi.org/10.1007/s40152-018-0100-1>
- Klöck, C. (2019). Dealing with climate change in the German Wadden Sea: Perceptions, measures, and contestation on Hallig Hooge. In *Ocean & Coastal Management* (Vol. 179, p. 104864). Elsevier BV. <https://doi.org/10.1016/j.ocecoaman.2019.104864>
- Koerth, J., Vafeidis, A. T., Hinkel, J., & Sterr, H. (2013). What motivates coastal households to adapt pro-actively to sea-level rise and increasing flood risk? In *Regional Environmental Change* (Vol. 13, Issue 4, pp. 897–909). Springer Science and Business Media LLC. <https://doi.org/10.1007/s10113-012-0399-x>
- Kruger, L. (2016). The timing of agricultural production in hazard-prone areas to prevent losses at peak-risk periods: A case of Malawi, Madagascar and Mozambique. In *Jambá: Journal of Disaster Risk Studies* (Vol. 8, Issue 2). AOSIS. <https://doi.org/10.4102/jamba.v8i2.179>
- Kutzner, D. (2019). Environmental change, resilience, and adaptation in nature-based tourism: conceptualizing the social-ecological resilience of birdwatching tour operations. In *Journal of Sustainable Tourism* (Vol. 27, Issue 8, pp. 1142–1166). Informa UK Limited. <https://doi.org/10.1080/09669582.2019.1601730>
- Lama, P. D. (2018). Gendered consequences of mobility for adaptation in small island developing states: case studies from Maafushi and Kudafari in the Maldives. In *Island Studies Journal* (Vol. 13, Issue 2, pp. 111–128). Island Studies Journal. <https://doi.org/10.24043/isj.64>
- Landicho, L. D., Paelmo, R. F., Cabahug, R. D., de Luna, C. C., Visco, R. G., Tolentino, L. L. (2016). Climate Change Adaptation Strategies of Smallholder Agroforestry Farmers in the Philippines. *Journal of Environmental Science and Management*, 19(1), 37–45.
- Laurice Jamero, Ma., Onuki, M., Esteban, M., Billones-Sensano, X. K., Tan, N., Nellas, A., Takagi, H., Thao, N. D., & Valenzuela, V. P. (2017). Small-island communities in the Philippines prefer local measures to relocation in response to sea-level rise. In *Nature Climate Change* (Vol. 7, Issue 8, pp. 581–586). Springer Science and Business Media LLC. <https://doi.org/10.1038/nclimate3344>
- Lawrence, J., Quade, D., & Becker, J. (2014). Integrating the effects of flood experience on risk perception with responses to changing climate risk. In *Natural Hazards* (Vol. 74, Issue 3, pp.

1773–1794). Springer Science and Business Media LLC. <https://doi.org/10.1007/s11069-014-1288-z>

- Lipset, D. (2013). The New State of Nature: Rising Sea-levels, Climate Justice, and Community-based Adaptation in Papua New Guinea (2003–2011). *Conservation and Society*, 11(2), 144–157.
- Lo, A. Y., & Chan, F. (2017). Preparing for flooding in England and Wales: the role of risk perception and the social context in driving individual action. In *Natural Hazards* (Vol. 88, Issue 1, pp. 367–387). Springer Science and Business Media LLC. <https://doi.org/10.1007/s11069-017-2870-y>
- Magee, A. D., Verdon-Kidd, D. C., Kiem, A. S., & Royle, S. A. (2016). Tropical cyclone perceptions, impacts and adaptation in the Southwest Pacific: an urban perspective from Fiji, Vanuatu and Tonga. In *Natural Hazards and Earth System Sciences* (Vol. 16, Issue 5, pp. 1091–1105). Copernicus GmbH. <https://doi.org/10.5194/nhess-16-1091-2016>
- Makame, M. O., & Mwevura, H. (2019). Vulnerability and Adaptation Strategies of Coastal Communities to the Associated Impacts of Sea Level Rise and Coastal Flooding. In *Springer Climate* (pp. 35–51). Springer International Publishing. [https://doi.org/10.1007/978-3-030-04897-6\\_3](https://doi.org/10.1007/978-3-030-04897-6_3)
- Maldonado, J. K., Shearer, C., Bronen, R., Peterson, K., & Lazrus, H. (2013). The impact of climate change on tribal communities in the US: displacement, relocation, and human rights. In *Climatic Change* (Vol. 120, Issue 3, pp. 601–614). Springer Science and Business Media LLC. <https://doi.org/10.1007/s10584-013-0746-z>
- Malenab, M. C. T., Amparo, J. M. S., Atole, M. R. J. T., Visco, E. S., Torio, D. A., Mendoza, M. D. (2018). Integrated Adaptation Management Approach toward Sustained Fish Production by Fish Farmers of Marilao-Meycauayan-Obando River System. *Asian Journal of Agriculture and Development*, 15(1), 61–73.
- Marfai, M. A., Sekaranom, A. B., & Ward, P. (2014). Community responses and adaptation strategies toward flood hazard in Jakarta, Indonesia. In *Natural Hazards* (Vol. 75, Issue 2, pp. 1127–1144). Springer Science and Business Media LLC. <https://doi.org/10.1007/s11069-014-1365-3>
- McElduff, L., & Ritchie, H. (2018). Fostering coastal community resilience: Mobilising people-place relationships. In *Area* (Vol. 50, Issue 2, pp. 186–194). Wiley. <https://doi.org/10.1111/area.12419>
- McMichael, C., & Katonivualiku, M. (2020). Thick temporalities of planned relocation in Fiji. In *Geoforum* (Vol. 108, pp. 286–294). Elsevier BV. <https://doi.org/10.1016/j.geoforum.2019.06.012>
- McNamara, K. E., & Prasad, S. S. (2014). Coping with extreme weather: communities in Fiji and Vanuatu share their experiences and knowledge. In *Climatic Change* (Vol. 123, Issue 2, pp. 121–132). Springer Science and Business Media LLC. <https://doi.org/10.1007/s10584-013-1047-2>
- Mercer, J., Kelman, I., do Rosario, F., de Deus de Jesus Lima, A., da Silva, A., Beloff, A.-M., & McClean, A. (2014). Nation-building policies in Timor-Leste: disaster risk reduction, including climate change adaptation. In *Disasters* (Vol. 38, Issue 4, pp. 690–718). Wiley. <https://doi.org/10.1111/disa.12082>

- Metcalf, S. J., van Putten, E. I., Frusher, S., Marshall, N. A., Tull, M., Caputi, N., Haward, M., Hobday, A. J., Holbrook, N. J., Jennings, S. M., Pecl, G. T., & Shaw, J. (2015). Measuring the vulnerability of marine social-ecological systems: a prerequisite for the identification of climate change adaptations. In *Ecology and Society* (Vol. 20, Issue 2). Resilience Alliance, Inc. <https://doi.org/10.5751/es-07509-200235>
- Middelbeek, L., Kolle, K., & Verrest, H. (2014). Built to last? Local climate change adaptation and governance in the Caribbean – The case of an informal urban settlement in Trinidad and Tobago. In *Urban Climate* (Vol. 8, pp. 138–154). Elsevier BV. <https://doi.org/10.1016/j.uclim.2013.12.003>
- Moghal, Z., & O’Connell, E. (2018). Multiple stressors impacting a small island tourism destination-community: A nested vulnerability assessment of Oistins, Barbados. In *Tourism Management Perspectives* (Vol. 26, pp. 78–88). Elsevier BV. <https://doi.org/10.1016/j.tmp.2018.03.004>
- Monnereau, I., & Abraham, S. (2013). Limits to autonomous adaptation in response to coastal erosion in Kosrae, Micronesia. In *International Journal of Global Warming* (Vol. 5, Issue 4, p. 416). Inderscience Publishers. <https://doi.org/10.1504/ijgw.2013.057283>
- Moulton, A. A., & Popke, J. (2016). Greenhouse governmentality: Protected agriculture and the changing biopolitical management of agrarian life in Jamaica. In *Environment and Planning D: Society and Space* (Vol. 35, Issue 4, pp. 714–732). SAGE Publications. <https://doi.org/10.1177/0263775816679669>
- Mulyasari, G., Irham, Waluyati, L. R., & Suryantini, A. (2018). Perceptions and local adaptation strategies to climate change of marine capture fishermen in Bengkulu Province, Indonesia. In *IOP Conference Series: Earth and Environmental Science* (Vol. 200, p. 012037). IOP Publishing. <https://doi.org/10.1088/1755-1315/200/1/012037>
- Munandar, A., Rahardjo, E. T., & Cahyani, A. (2019). Correlation Between Knowledge of The Farmers - The Alumni of Climate Field School at Kabupaten Bogor and Adaption to Climate Change. In *IOP Conference Series: Earth and Environmental Science* (Vol. 256, p. 012041). IOP Publishing. <https://doi.org/10.1088/1755-1315/256/1/012041>
- Murniati, K., Widjaya, S., Rabiatal, A., & Listiana, I. (2019). Climate change adaptation strategy for sustainability and food security of cassava farming households in Lampung, Indonesia. In *Journal of Agricultural Extension* (Vol. 23, Issue 2, p. 138). African Journals Online (AJOL). <https://doi.org/10.4314/jae.v23i2.14>
- Murtagh, N., Gatersleben, B., & Fife-Schaw, C. (2019). Occupants’ motivation to protect residential building stock from climate-related overheating: A study in southern England. In *Journal of Cleaner Production* (Vol. 226, pp. 186–194). Elsevier BV. <https://doi.org/10.1016/j.jclepro.2019.04.080>
- Mutaqin, D. J. (2019). Determinants of Farmers’ Decisions on Risk Coping Strategies in Rural West Java. In *Climate* (Vol. 7, Issue 1, p. 7). MDPI AG. <https://doi.org/10.3390/cli7010007>
- Muttaqin, Z., Yulianti, A., & Karmanah. (2019). Climate village program (ProKlim) in Simurugul Sub-Village, Margawati Village, Garut Kota Sub-Regency, Garut Regency, West Java Province, Indonesia. In *IOP Conference Series: Earth and Environmental Science* (Vol. 299, Issue 1, p. 012046). IOP Publishing. <https://doi.org/10.1088/1755-1315/299/1/012046>



- Nalau, J., Becken, S., Schliephack, J., Parsons, M., Brown, C., & Mackey, B. (2018). The Role of Indigenous and Traditional Knowledge in Ecosystem-Based Adaptation: A Review of the Literature and Case Studies from the Pacific Islands. In *Weather, Climate, and Society* (Vol. 10, Issue 4, pp. 851–865). American Meteorological Society. <https://doi.org/10.1175/wcas-d-18-0032.1>
- Neef, A., Bengé, L., Boruff, B., Pauli, N., Weber, E., & Varea, R. (2018). Climate adaptation strategies in Fiji: The role of social norms and cultural values. In *World Development* (Vol. 107, pp. 125–137). Elsevier BV. <https://doi.org/10.1016/j.worlddev.2018.02.029>
- Nelson, G. L. M., Zamora, O. B., de Guzman, L. E. P., Tatlonghari, R. V., Espaldon, M. V. O., Brillón, J. A. (2019). The Indigenous Practices and Climate Change Responses of Ati and Suludnon Farmers in Iloilo, Philippines. *Journal of Environmental Science and Management*, 22(1), 87–98.
- Nguyen, K. A. T., Jolly, C. M., Le, T. T. H., Bui, C. N. P. T. (2015). Climate change awareness, coping mechanisms and adaptation in poor rural coastal communities, Ben Tre Province, Vietnam. *Int. J. Global Warming*, 8(3), 416–435.
- Nolet, E. (2016). ‘Are you prepared?’ Representations and management of floods in Lomanikoro, Rewa (Fiji). In *Disasters* (Vol. 40, Issue 4, pp. 720–739). Wiley. <https://doi.org/10.1111/disa.12175>
- Oakes, L. E., Ardoin, N. M., & Lambin, E. F. (2016). &#8220;I know, therefore I adapt?&#8221; Complexities of individual adaptation to climate-induced forest dieback in Alaska. In *Ecology and Society* (Vol. 21, Issue 2). Resilience Alliance, Inc. <https://doi.org/10.5751/es-08464-210240>
- Ofreneo, R. P., & Hega, M. D. (2016). Women’s solidarity economy initiatives to strengthen food security in response to disasters. In *Disaster Prevention and Management* (Vol. 25, Issue 2, pp. 168–182). Emerald. <https://doi.org/10.1108/dpm-11-2015-0258>
- Oka, N., Higashimaki, T., Witharana, D. D. P., Wakeyo, M. B. (2015). Constrains and Consensus on Water Use and Land Allocation in Minor Scheme Tanks in the Dry Zone of Sri Lanka. *Scientific Papers Series Management, Economic Engineering in Agriculture and Rural Development*, 15(4), 185–190.
- Okaka, F. O., & Odhiambo, B. D. O. (2019). Households’ perception of flood risk and health impact of exposure to flooding in flood-prone informal settlements in the coastal city of Mombasa. In *International Journal of Climate Change Strategies and Management* (Vol. 11, Issue 4, pp. 592–606). Emerald. <https://doi.org/10.1108/ijccsm-03-2018-0026>
- Otoara Ha’apio, M., Wairiu, M., Gonzalez, R., & Morrison, K. (2018). Transformation of rural communities: lessons from a local self-initiative for building resilience in the Solomon Islands. In *Local Environment* (Vol. 23, Issue 3, pp. 352–365). Informa UK Limited. <https://doi.org/10.1080/13549839.2017.1420640>
- Paelmo, Roselyn & Cosico, Russel Son & Cabahug, R.E.D. & Castillo, Arnold Karl & Castillo, A.S.A. & Visco, Roberto (2018). Farmers’ perception on the sustainability of as a climate change adaptation strategy in agusan agusan del sur and north cotobato, Philippines. *Journal of Environmental Science and Management*. 21. 45-60.

- Parsons, M., Brown, C., Nalau, J., & Fisher, K. (2017). Assessing adaptive capacity and adaptation: insights from Samoan tourism operators. In *Climate and Development* (Vol. 10, Issue 7, pp. 644–663). Informa UK Limited. <https://doi.org/10.1080/17565529.2017.1410082>
- Pasaribu, S. M., & Sudiyanto, A. (2016). Agricultural Risk Management: Lesson Learned from the Application of Rice Crop Insurance in Indonesia. In *Climate Change Policies and Challenges in Indonesia* (pp. 305–322). Springer Japan. [https://doi.org/10.1007/978-4-431-55994-8\\_14](https://doi.org/10.1007/978-4-431-55994-8_14)
- Paulus, C. A., Pellokila, M. R., Sobang, Y. U. L., Azmanajaya, E. (2019). The alternative livelihood development strategy in order to improve local fishermen revenue in the border region of Indonesia and Timor Leste. *AACL Bioflux*, 12(1), 269–279.
- Pecl, G. T., Ogier, E., Jennings, S., van Putten, I., Crawford, C., Fogarty, H., Frusher, S., Hobday, A. J., Keane, J., Lee, E., MacLeod, C., Mundy, C., Stuart-Smith, J., & Tracey, S. (2019). Autonomous adaptation to climate-driven change in marine biodiversity in a global marine hotspot. In *Ambio* (Vol. 48, Issue 12, pp. 1498–1515). Springer Science and Business Media LLC. <https://doi.org/10.1007/s13280-019-01186-x>
- Peñalba, E. H. (2019). Adaptation to Climate Change among Farmers in Bulacan, Philippines. *Journal of Rural and Community Development*, 14(2), 1–23.
- Peñalba, L. and Elazegui, D. (2013). Improving Adaptive Capacity of Small-Scale Rice Farmers: Comparative Analysis of Lao Pdr and the Philippines. In *World Applied Sciences Journal* 24 (9): 1211-1220. doi: 10.5829/idosi.wasj.2013.24.09.13274
- Penet, L., Barthe, E., Alleyne, A., & Blazy, J. M. (2016). Disease risk perception and diversity of management strategies by farmers: The case of anthracnose caused by *Colletotrichum gloeosporioides* on water yams (*Dioscorea alata*) in Guadeloupe. In *Crop Protection* (Vol. 88, pp. 7–17). Elsevier BV. <https://doi.org/10.1016/j.cropro.2016.05.005>
- Penot, E., Fevre, V., Flodrops, P., & Razafimahatratra, H. M. (2018). Conservation Agriculture to buffer and alleviate the impact of climatic variations in Madagascar: farmers' perception. In *Cahiers Agricultures* (Vol. 27, Issue 2, p. 25003). EDP Sciences. <https://doi.org/10.1051/cagri/2018009>
- Peria, A., Pulhin, J., Tapia, M., Predo, C., Peras, R. J., Evangelista, R. J., Lasco, R., & Pulhin, F. (2016). Knowledge, Risk Attitudes and Perceptions on Extreme Weather Events of Smallholder Farmers in Ligao City, Albay, Bicol, Philippines. In *Journal of Environmental Science and Management* (pp. 31–41). School of Environmental Science and Management, University of the Philippines Los Banos. [https://doi.org/10.47125/jesam/2016\\_sp1/03](https://doi.org/10.47125/jesam/2016_sp1/03)
- Petzold, J. (2015). Limitations and opportunities of social capital for adaptation to climate change: a case study on the Isles of Scilly. In *The Geographical Journal* (Vol. 182, Issue 2, pp. 123–134). Wiley. <https://doi.org/10.1111/geoj.12154>
- Petzold, J. (2018). Social adaptability in ecotones: sea-level rise and climate change adaptation in Flushing and the Isles of Scilly, UK. In *Island Studies Journal* (Vol. 13, Issue 1, pp. 101–118). Island Studies Journal. <https://doi.org/10.24043/isj.17>
- Porio, E. (2014). Climate Change Vulnerability and Adaptation in Metro Manila. In *Asian Journal of Social Science* (Vol. 42, Issues 1–2, pp. 75–102). Elsevier BV. <https://doi.org/10.1163/15685314-04201006>

- Premarathne, N. M. K. C., Dissanayake, S. T. M., De Silva, S., Weerathunga, U. S., & Kumara, T. V. P. (2017). Impact of Changed Rainfall Patterns Due to Climate Change and Usage of Available Weather Information by Communities Who Face Human Elephant Conflict (HEC) in Udawalawe, Sri Lanka. In International Conference on Climate Change. International Conference on Climate Change. The International Institute of Knowledge Management (TIKM). <https://doi.org/10.17501/iccc.2017.1105>
- Purwanto, E., & Darmawan, E. (2018). The adaptation strategy of dwelling in the riverside settlement of the Arut River in Pangkalan Bun City, West Kotawaringin Regency, Central Kalimantan. In IOP Conference Series: Earth and Environmental Science (Vol. 213, p. 012033). IOP Publishing. <https://doi.org/10.1088/1755-1315/213/1/012033>
- Quinn, T., Bousquet, F., Guerbois, C., Heider, L., & Brown, K. (2019). How local water and waterbody meanings shape flood risk perception and risk management preferences. In Sustainability Science (Vol. 14, Issue 3, pp. 565–578). Springer Science and Business Media LLC. <https://doi.org/10.1007/s11625-019-00665-0>
- Raftoyannis, Y., Nocentini, S., Marchi, E., Calama Sainz, R., Garcia Guemes, C., Pilas, I., Peric, S., Amaral Paulo, J., Moreira-Marcelino Ana, C., Costa-Ferreira, M., Kakouris, E., & Lindner, M. (2014). Perceptions of forest experts on climate change and fire management in European Mediterranean forests. In iForest - Biogeosciences and Forestry (Vol. 7, Issue 1, pp. 33–41). Italian Society of Sivilculture and Forest Ecology (SISEF). <https://doi.org/10.3832/ifor0817-006>
- Rahman, M. K., Paul, B. K., Curtis, A., & Schmidlin, T. W. (2014). Linking Coastal Disasters and Migration: A Case Study of Kutubdia Island, Bangladesh. In The Professional Geographer (Vol. 67, Issue 2, pp. 218–228). Informa UK Limited. <https://doi.org/10.1080/00330124.2014.922020>
- Rahman, S., Islam, M. S., Khan, M. N. H., & Touhiduzzaman, M. (2019). Climate change adaptation and disaster risk reduction (DRR) through coastal afforestation in South-Central Coast of Bangladesh. In Management of Environmental Quality: An International Journal (Vol. 30, Issue 3, pp. 498–517). Emerald. <https://doi.org/10.1108/meq-01-2018-0021>
- Rahmawati, H., & Lestari, A. M. T. (2018). Tackling everyday risks through climate adaptive organic farming. In Disaster Prevention and Management: An International Journal (Vol. 28, Issue 1, pp. 60–68). Emerald. <https://doi.org/10.1108/dpm-06-2018-0201>
- Rakotobe, Z. L., Harvey, C. A., Rao, N. S., Dave, R., Rakotondravelo, J. C., Randrianarisoa, J., Ramanahadray, S., Andriambolantsoa, R., Razafimahatratra, H., Rabarijohn, R. H., Rajaofara, H., Rameson, H., & MacKinnon, J. L. (2016). Strategies of smallholder farmers for coping with the impacts of cyclones: A case study from Madagascar. In International Journal of Disaster Risk Reduction (Vol. 17, pp. 114–122). Elsevier BV. <https://doi.org/10.1016/j.ijdr.2016.04.013>
- Reckien, D., & Petkova, E. P. (2019). Who is responsible for climate change adaptation? In Environmental Research Letters (Vol. 14, Issue 1, p. 014010). IOP Publishing. <https://doi.org/10.1088/1748-9326/aaf07a>
- Renaud, F. G., Le, T. T. H., Lindener, C., Guong, V. T., & Sebesvari, Z. (2014). Resilience and shifts in agro-ecosystems facing increasing sea-level rise and salinity intrusion in Ben Tre Province, Mekong Delta. In Climatic Change (Vol. 133, Issue 1, pp. 69–84). Springer Science and Business Media LLC. <https://doi.org/10.1007/s10584-014-1113-4>

- Rey, D., Holman, I. P., & Knox, J. W. (2017). Developing drought resilience in irrigated agriculture in the face of increasing water scarcity. In *Regional Environmental Change* (Vol. 17, Issue 5, pp. 1527–1540). Springer Science and Business Media LLC. <https://doi.org/10.1007/s10113-017-1116-6>
- Rosol, R., Powell-Hellyer, S., & Chan, H. M. (2016). Impacts of decline harvest of country food on nutrient intake among Inuit in Arctic Canada: impact of climate change and possible adaptation plan. In *International Journal of Circumpolar Health* (Vol. 75, Issue 1, p. 31127). Informa UK Limited. <https://doi.org/10.3402/ijch.v75.31127>
- Rouse, H., Bell, R., Lundquist, C., Blackett, P., Hicks, D., & King, D.-N. (2016). Coastal adaptation to climate change in Aotearoa-New Zealand. In *New Zealand Journal of Marine and Freshwater Research* (Vol. 51, Issue 2, pp. 183–222). Informa UK Limited. <https://doi.org/10.1080/00288330.2016.1185736>
- Rowan Gard, A., & Veitayaki, J. (2017). In the wake of winston – climate change, mobility and resiliency in fiji. In *International Journal of Safety and Security Engineering* (Vol. 7, Issue 2, pp. 157–168). International Information and Engineering Technology Association. <https://doi.org/10.2495/safe-v7-n2-157-168>
- Rusdiyana, E., & Suminah. (2018). An adaptation strategy of sandland peasants in Yogyakarta toward climate change. In *IOP Conference Series: Earth and Environmental Science* (Vol. 129, p. 012040). IOP Publishing. <https://doi.org/10.1088/1755-1315/129/1/012040>
- Saito, N. (2012). Mainstreaming climate change adaptation in least developed countries in South and Southeast Asia. In *Mitigation and Adaptation Strategies for Global Change* (Vol. 18, Issue 6, pp. 825–849). Springer Science and Business Media LLC. <https://doi.org/10.1007/s11027-012-9392-4>
- Sajise, A. J., Perez, M. L., Zamora, G. J., Ramirez, P. J. B., Arias, J. K. B. (2017). Determinants of Climate Change Adaptive Behavior in Coastal Communities in Southeast Asia. *Asian Journal of Agriculture and Development*, 14(2), 49–61.
- Sánchez, A., & Izzo, M. (2016). Micro hydropower: an alternative for climate change mitigation, adaptation, and development of marginalized local communities in Hispaniola Island. In *Climatic Change* (Vol. 140, Issue 1, pp. 79–87). Springer Science and Business Media LLC. <https://doi.org/10.1007/s10584-016-1865-0>
- Santos, F. M. dos, & Carmo, R. L. do. (2017). As dimensões humanas das mudanças ambientais: percepção ambiental e estratégias de adaptação em Ilha Comprida – São Paulo. In *Revista de Gestão Costeira Integrada* (Vol. 17, Issue 2, pp. 99–116). Associacao Portuguesa dos Recursos Hidricos (APRH). <https://doi.org/10.5894/rgci-n54>
- Saroar, M. M. (2017). Ecosystem-Based Adaptation (EbA) for Coastal Resilience Against Water Related Disasters in Bangladesh. In *Climate Change Management* (pp. 187–205). Springer International Publishing. [https://doi.org/10.1007/978-3-319-70703-7\\_10](https://doi.org/10.1007/978-3-319-70703-7_10)
- Scholten, P., Keskitalo, E., & Meijerink, S. (2015). Bottom-up initiatives toward climate change adaptation in cases in the Netherlands and the UK: a complexity leadership perspective. In *Environment and Planning C: Government and Policy* (Vol. 33, Issue 5, pp. 1024–1038). SAGE Publications. <https://doi.org/10.1177/0263774x15605929>

- Simon, K., Diprose, G., & Thomas, A. C. (2019). Community-led initiatives for climate adaptation and mitigation. In *Kōtuitui: New Zealand Journal of Social Sciences Online* (Vol. 15, Issue 1, pp. 93–105). Informa UK Limited. <https://doi.org/10.1080/1177083x.2019.1652659>
- Solecki, W., Leichenko, R., & Eisenhauer, D. (2017). Extreme Climate Events, Household Decision-Making and Transitions in the Immediate Aftermath of Hurricane Sandy. In *Miscellanea Geographica* (Vol. 21, Issue 4, pp. 139–150). Walter de Gruyter GmbH. <https://doi.org/10.1515/mgrsd-2017-0029>
- Sovacool, B. K., Linnér, B.-O., & Klein, R. J. T. (2016). Climate change adaptation and the Least Developed Countries Fund (LDCF): Qualitative insights from policy implementation in the Asia-Pacific. In *Climatic Change* (Vol. 140, Issue 2, pp. 209–226). Springer Science and Business Media LLC. <https://doi.org/10.1007/s10584-016-1839-2>
- Stojanov, R., Duží, B., Kelman, I., Němec, D., & Procházka, D. (2016). Local perceptions of climate change impacts and migration patterns in Malé, Maldives. In *The Geographical Journal* (Vol. 183, Issue 4, pp. 370–385). Wiley. <https://doi.org/10.1111/geoj.12177>
- Suckall, N., Tompkins, E., & Stringer, L. (2014). Identifying trade-offs between adaptation, mitigation and development in community responses to climate and socio-economic stresses: Evidence from Zanzibar, Tanzania. In *Applied Geography* (Vol. 46, pp. 111–121). Elsevier BV. <https://doi.org/10.1016/j.apgeog.2013.11.005>
- Sugihardjo, Sutrisno, J., Setyono, P., & Suntoro. (2018). Dynamic models of farmers adaptation to climate change (case of rice farmers in Cemoro Watershed, Central Java, Indonesia). In *IOP Conference Series: Earth and Environmental Science* (Vol. 142, p. 012051). IOP Publishing. <https://doi.org/10.1088/1755-1315/142/1/012051>
- Takasaki, Y. (2015). Learning from disaster: community-based marine protected areas in Fiji. In *Environment and Development Economics* (Vol. 21, Issue 1, pp. 53–77). Cambridge University Press (CUP). <https://doi.org/10.1017/s1355770x15000108>
- Tatlonghari, G. T., & Paris, T. R. (2012). Gendered Adaptations to Climate Change: A Case Study from the Philippines. In *Research, Action and Policy: Addressing the Gendered Impacts of Climate Change* (pp. 237–250). Springer Netherlands. [https://doi.org/10.1007/978-94-007-5518-5\\_17](https://doi.org/10.1007/978-94-007-5518-5_17)
- Tozier de la Poterie, A., Burchfield, E. K., & Carrico, A. R. (2018). The implications of group norms for adaptation in collectively managed agricultural systems: evidence from Sri Lankan paddy farmers. In *Ecology and Society* (Vol. 23, Issue 3). Resilience Alliance, Inc. <https://doi.org/10.5751/es-10175-230321>
- Utami, A. W., Cramer, L. A., Rosenberger, N. (2018). Staple Food Diversification Versus Raskin: Developing Climate Change Resilience in Rural Indonesia. *Human Organization*, 77(4), 359–370.
- van Voorst, R., & Hellman, J. (2015). One Risk Replaces Another. In *Asian Journal of Social Science* (Vol. 43, Issue 6, pp. 786–810). Elsevier BV. <https://doi.org/10.1163/15685314-04306007>
- Vedeld, T., Coly, A., Ndour, N. M., & Hellevik, S. (2015). Climate adaptation at what scale? Multi-level governance, resilience, and coproduction in Saint Louis, Senegal. In *Natural Hazards* (Vol. 82, Issue S2, pp. 173–199). Springer Science and Business Media LLC. <https://doi.org/10.1007/s11069-015-1875-7>

- Vogt, N., Pinedo-Vasquez, M., Brondízio, E. S., Rabelo, F. G., Fernandes, K., Almeida, O., Riveiro, S., Deadman, P. J., & Dou, Y. (2016). Local ecological knowledge and incremental adaptation to changing flood patterns in the Amazon delta. In *Sustainability Science* (Vol. 11, Issue 4, pp. 611–623). Springer Science and Business Media LLC. <https://doi.org/10.1007/s11625-015-0352-2>
- Walker, B. J., Adger, W. N., & Russel, D. (2014). Institutional barriers to climate change adaptation in decentralised governance structures: Transport planning in England. In *Urban Studies* (Vol. 52, Issue 12, pp. 2250–2266). SAGE Publications. <https://doi.org/10.1177/0042098014544759>
- Walshe, R. A., Chang Seng, D., Bumpus, A., & Auffray, J. (2017). Perceptions of adaptation, resilience and climate knowledge in the Pacific. In *International Journal of Climate Change Strategies and Management* (Vol. 10, Issue 2, pp. 303–322). Emerald. <https://doi.org/10.1108/ijccsm-03-2017-0060>
- Wamsler, C., & Brink, E. (2014). Interfacing citizens’ and institutions’ practice and responsibilities for climate change adaptation. In *Urban Climate* (Vol. 7, pp. 64–91). Elsevier BV. <https://doi.org/10.1016/j.uclim.2013.10.009>
- Wijaya, N. (2015). Climate Change Adaptation Measures in the Coastal City of Semarang, Indonesia: Current Practices and Performance. *Jurnal Perencanaan Wilayah dan Kota*, 26(1), 28–42.
- Williams, N. E., & Carrico, A. (2017). Examining adaptations to water stress among farming households in Sri Lanka’s dry zone. In *Ambio* (Vol. 46, Issue 5, pp. 532–542). Springer Science and Business Media LLC. <https://doi.org/10.1007/s13280-017-0904-z>
- Wong, E., Jiang, M., Klint, L., DeLacy, T., Harrison, D., & Dominey-Howes, D. (2013). Policy Environment for the Tourism Sector’s Adaptation to Climate Change in the South Pacific – The Case of Samoa. In *Asia Pacific Journal of Tourism Research* (Vol. 18, Issues 1–2, pp. 52–71). Informa UK Limited. <https://doi.org/10.1080/10941665.2012.688511>
- Wu, C.-F., Hsieh, Y.-F., & Ou, S.-J. (2015). Thermal Adaptation Methods of Urban Plaza Users in Asia’s Hot-Humid Regions: A Taiwan Case Study. In *International Journal of Environmental Research and Public Health* (Vol. 12, Issue 10, pp. 13560–13586). MDPI AG. <https://doi.org/10.3390/ijerph121013560>
- Yamashita, S., Matsuda, S., Watanabe, R., Shimatani, Y., Moriyama, T., Hayashi, H., Iyooka, H., Hamada, T., Yamashita, T., Kakudo, K., & Minagawa, T. (2016). A Registration System for Preventing/Mitigating Urban Flood Disasters as One Way to Smartly Adapt to Climate Change in Japanese Cities. In *International Review for Spatial Planning and Sustainable Development* (Vol. 4, Issue 2, pp. 18–29). International Community of Spatial Planning and Sustainable Development. [https://doi.org/10.14246/irspsd.4.2\\_18](https://doi.org/10.14246/irspsd.4.2_18)
- Yang, J., Owusu, V., Andriesse, E., & Dziwornu Ablo, A. (2019). In-Situ Adaptation and Coastal Vulnerabilities in Ghana and Tanzania. In *The Journal of Environment & Development* (Vol. 28, Issue 3, pp. 282–308). SAGE Publications. <https://doi.org/10.1177/1070496519852992>
- Yoga Putra, G. A., Koestoer, R. H., & Lestari, I. (2019). Local resilience towards overcoming floods of local climate change for adaptation: A study of marunda community in north jakarta. In

IOP Conference Series: Earth and Environmental Science (Vol. 239, p. 012043). IOP Publishing. <https://doi.org/10.1088/1755-1315/239/1/012043>

- Yuliati, Yayuk & Primasari, D.A. (2018). Farmers' adaptation to climate change in the Tengger Mountains (case study in Ngadas Village, Poncokusumo District, Malang Regency, East Java, Indonesia). *Asian Journal of Microbiology, Biotechnology and Environmental Sciences*. 20. 757-763.
- Zhang, T., & Bakar, S. (2017). The Implications of Local Perceptions, Knowledge, and Adaptive Strategies for Adaptation Planning in Coastal Communities of Zanzibar. In *Environmental Justice* (Vol. 10, Issue 4, pp. 112–118). Mary Ann Liebert Inc. <https://doi.org/10.1089/env.2016.0031>

## References

- Fischer, A. P., Callaghan, M., Berrang-Ford, L., Nielsen, M., Sotnik, G., Canosa, I. V., et al. (2021). The Global Adaptation Mapping Initiative (GAMI): Part 2 – Screening protocol. Protocol Exchange doi: 10.21203/rs.3.pex-1241/v1.
- Lesnikowski, A., Berrang-Ford, L., Siders, A. R., Haddaway, N., Biesbroek, R., Harper, S., et al. (2021). The Global Adaptation Mapping Initiative (GAMI): Part 3 – Coding protocol. Protocol Exchange doi: 10.21203/rs.3.pex-1242/v1.
